# Supplementary material for: Colorless metallodithiolene oligomers and polymers with intense near- and mid-infrared absorption
Source: Royal Society of Chemistry journal article supplement (doi:10.1039/c4ra13039a), 2014-12-12
Supplement: c4ra13039a1.pdf [file c4ra13039a1.pdf]

## Support Information

### Colorless Metallodithiolene Oligomers and Polymers with Intense Near- and Mid-Infrared Absorption

Bo Liu,<sup>ab</sup> Wenqiang Qiao<sup>\*a</sup> and Zhi Yuan Wang<sup>\*ac</sup>

<sup>a</sup> State Key Laboratory of Polymer Physics and Chemistry, Changchun Institute of Applied Chemistry, Chinese Academy of Sciences, Changchun, 130022, China

<sup>b</sup> University of Chinese Academy of Sciences, Beijing, 100049, China

<sup>c</sup> Department of Chemistry, Carleton University, 1125 Colonel By Drive, Ottawa, Ontario, Canada K1S 5B6

|                                                                                                            |    |
|------------------------------------------------------------------------------------------------------------|----|
| SI-1. General methods.....                                                                                 | 2  |
| SI-2. Materials.....                                                                                       | 2  |
| SI-3. Synthesis <b>1-3</b> .....                                                                           | 3  |
| SI-4. <sup>1</sup> H, <sup>13</sup> C and <sup>31</sup> P NMR and MS spectra of compounds <b>1-8</b> ..... | 6  |
| SI-5. Cyclic voltammograms of complexes <b>4-7</b> .....                                                   | 18 |
| SI-6. TGA of polymer <b>8</b> .....                                                                        | 19 |
| SI-7. Cyclic voltammogram of polymer <b>8</b> .....                                                        | 20 |
| SI-8. GPC analysis of polymer <b>8</b> .....                                                               | 21 |
| SI-9. Preparation and characterizations of colorless films of <b>7</b> /PSMMA blends.....                  | 22 |
| SI-10. Preparation and characterizations of colorless films of <b>8</b> /PVDF blends.....                  | 23 |
| References.....                                                                                            | 23 |

## SI-1. General Methods

NMR spectra were recorded on Bruker Avance 300 (300 MHz) and Bruker Avance 400 (400 MHz) NMR spectrometers. Chemical shifts (ppm) are given relative to  $\text{CDCl}_3$ , 7.26 ppm ( $^1\text{H}$  NMR) and 77.16 ppm ( $^{13}\text{C}$  NMR), with TMS as internal reference and  $\text{H}_3\text{PO}_4$  as external reference for  $^{31}\text{P}$  NMR spectra, respectively. Multiplets were assigned as s (singlet), d (doublet), t (triplet), dd (doublet of doublet), sep (septet), m (multiplet) and br (broad). All the measurements were carried out at room temperature unless otherwise stated. All the compounds were characterized by MS (mass spectroscopy): MALDI-TOF-MS were obtained from Bruker Daltonics Autoflex III time-of-flight (TOF) mass spectrometry; Electron impact mass spectrometry (EI-MS) were recorded on Agilent Technologies 5975 mass spectrometer and Electrospray ionization mass spectrometry (ESI-MS) were recorded on Waters Quattro Premier XE. Elemental analysis was performed on Elementar Vario EL cube analyzer. Thermogravimetric analysis (TGA) was performed on a PerkinElmer Pyris Diamond TG from 50 to 800 °C at a heating rate of 10 °C /min under a continuous nitrogen flow. The analysis of metals (Ni and Pd) was carried on inductive coupled plasma optical emission spectrometer (Thermo Scientific iCAP 6000). Molecular weight of the polymer was determined on a Waters 1515 Gel Permeation Chromatography (GPC). UV-VIS-NIR spectra were recorded using a Shimadzu UV-3600 Spectrophotometers. IR spectra ( $4400\text{--}400\text{ cm}^{-1}$ ) were recorded using a Shimadzu FT-IR Affinity-1 Spectrometer. Cyclic voltammetry was done on a CHI660B electrochemical workstation, using a conventional three-electrode cell consisting of a platinum disk or glass-carbon as the working electrode, a platinum wire as the counter-electrode and  $\text{Ag}/\text{Ag}^+$  in a  $0.01\text{ mol}\cdot\text{dm}^{-3}$  of  $\text{AgNO}_3$  solution as the reference electrode. The experiments were performed at room temperature (25 °C) in dry DCM or  $\text{CH}_3\text{CN}$  containing  $0.1\text{ mol}\cdot\text{dm}^{-3}$   $\text{Bu}_4\text{NPF}_6$  as the supporting electrolyte, at a scan rate of  $100\text{ mV}\cdot\text{s}^{-1}$ .

## SI-2. Materials

All the reagents were used as received from Alfa Aesar, Acros Organics, and Aldrich. Air- and moisture-sensitive syntheses were carried with the standard Schlenk techniques in a Schlenk tube under argon atmosphere. Compound **1** was obtained according to literature [1]. Ligand **3** was synthesized from **2** according to literature [2,3]. The complexes were prepared according to the literature [4].

### SI-3. Synthesis

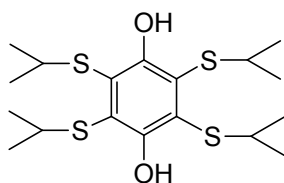

**2,3,5,6-Tetrakis(isopropylthio)benzene-1,4-dihydroquinone (1).** The suspension of sodium hydroxide (7.20 g, 180 mmol) and 2-propanethiol (22.3 mL, 240 mmol) in dry toluene (90 mL) was stirred for 2.5 hours at ambient temperature. Then, 200 mL of toluene solution containing 1,2,4,5-tetrachlorobenzoquinone (9.84 g, 40 mmol) was added dropwise and the resulting yellowish green suspension was stirred at 60 °C for 6 hours under argon. After the reaction mixture was cooled to ambient temperature, some de-ionized water was added to the mixture. The organic layer was separated and dried over anhydrous magnesium sulfate. The solvent was removed by rotary evaporation and recrystallization of the residue from hot methanol gave **1** as bright yellowish needle crystals (12.09 g, 74.3% yield). <sup>1</sup>H NMR (δ, ppm in CDCl<sub>3</sub>) 7.39 (s, 2H, -OH), 3.54-3.72 (sep, 4H, J = 8.8, 8.8 Hz, CH), 1.14-1.31 (d, 24 H, J = 8.8 Hz, CH<sub>3</sub>); <sup>13</sup>C NMR (δ, ppm in CDCl<sub>3</sub>) 151.54, 124.52, 38.52, 22.04; MS (ESI): 407.2 (M<sup>+</sup>); Anal. Calcd for C<sub>18</sub>H<sub>30</sub>O<sub>2</sub>S<sub>4</sub>: C, 53.16; H, 7.44; S, 31.54; Found: C, 53.14; H, 7.48; S, 31.45.

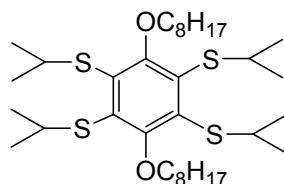

**3,6-Bis(octyloxy)-1,2,4,5-tetrakis(isopropylthio)benzene (2).** Compound **1** (6.10 g, 15.0 mmol) and potassium carbonate (12.44 g, 90.0 mmol) were mixed in dry toluene/N, N-dimethylformamide (100 mL/100 mL). To the resulting blood-red suspension, was added 1-bromo(-n)octane (6.95 g, 36.0 mmol) via a syringe. The reaction mixture was heated up to 100 °C and kept overnight under argon. After cooling to ambient temperature, the reaction mixture was washed with water twice. The aqueous phase was extracted with dichloromethane once, and the organic phase was combined and dried over anhydrous magnesium sulfate. After removal of the solvent, the brown-red sticky residue was purified on a silica gel column eluted with CH<sub>2</sub>Cl<sub>2</sub>/petroleum ether (1:3 v/v). Compound **2** was obtained as colorless oily liquid (9.23 g, 97.5% yield). <sup>1</sup>H NMR (δ, ppm in CDCl<sub>3</sub>) 3.93-4.01 (t, 4H, J = 6.8 Hz, -OCH<sub>2</sub>), 3.76-3.87 (sep, 4H, J = 6.8, 6.4, 6.8 Hz, CH), 1.73-1.83 (m, 4H, J = 7.6, 6.8 Hz, O-CH<sub>2</sub>-CH<sub>2</sub>), 1.43-1.54 (m, 4H, O-CH<sub>2</sub>-CH<sub>2</sub>-CH<sub>2</sub>), 1.23-1.42 (overlapping br, m, 16H), 1.15-1.22 (d, 24H, J = 6.4 Hz), 0.84-0.94 (t, 6H, J = 6.8 Hz); <sup>13</sup>C NMR (δ, ppm in CDCl<sub>3</sub>) 157.76, 134.57, 72.55, 38.52, 31.85, 30.43, 29.47, 29.29, 26.05, 22.89, 22.67, 14.08; MS (ESI): 631.5 (M<sup>+</sup>); Anal. Calcd for C<sub>34</sub>H<sub>62</sub>O<sub>2</sub>S<sub>4</sub>: C,

64.71; H, 9.90; S, 20.32; Found: C, 64.69; H, 10.01; S, 20.34.

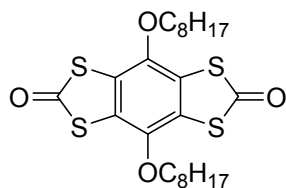

**4,8-Bis(octyloxy)-1,3,5,7-tetrathia-s-indacene-2,6-dione (3).** Naphthalene (15.38 g, 120 mmol) and sodium (5.52 g, 240 mmol) were stirred in 200 mL of THF at ambient temperature for 0.5 hour under argon. Compound **2** (12.37 g, 19.6 mmol) was added into the dark green solution and the resulting brown solution was stirred under argon at 50 °C for 20 hours. After cooling to -10 °C in an ice-salt bath, 15 mL of triethylamine was introduced. After another 15 minutes while being kept at -5~-10 °C, 110 mL of toluene containing triphosgene (11.87 g, 40 mmol) was added cautiously via addition funnel over 1 hour. The reaction mixture was stirred for one hour afterwards and quenched by adding 30 mL of de-ionized water dropwise over 45 minutes. The aqueous phase was extracted by dichloromethane and the organic phase was combined. The combined organic phase was dried over anhydrous sodium sulfate. After removal of the solvent, the brownish red residue was purified on a silica gel column eluted with CH<sub>2</sub>Cl<sub>2</sub>/petroleum ether (1:5 v/v) to give bright yellow solids. Recrystallization from dichloromethane gave pure **3** as bright yellow needle crystals (5.13 g, 51.0% yield). <sup>1</sup>H NMR (δ, ppm in CDCl<sub>3</sub>) 3.93-4.05 (t, 4H, J = 6.4 Hz, -OCH<sub>2</sub>), 1.72-1.81 (m, 4H, J = 6.8, 7.2 Hz, O-CH<sub>2</sub>-CH<sub>2</sub>), 1.41-1.54 (m, 4H, J = 6.4, 7.2 Hz, O-CH<sub>2</sub>-CH<sub>2</sub>-CH<sub>2</sub>), 1.24-1.34 (overlapping br, d, 16H), 0.85-0.93 (t, 6H, J = 6.8 Hz); <sup>13</sup>C NMR (δ, ppm in CDCl<sub>3</sub>) 188.11, 143.36, 125.06, 73.67, 31.77, 30.08, 29.24, 29.17, 25.79, 22.63, 14.08; MS (EI) m/z: 514 (M<sup>+</sup>); Anal. Calcd for C<sub>24</sub>H<sub>34</sub>O<sub>4</sub>S<sub>4</sub>: C, 56.00; H, 6.66; S, 24.92; Found: C, 56.01; H, 6.64; S, 25.01.

SI-4.  $^1\text{H}$ ,  $^{13}\text{C}$  and  $^{31}\text{P}$  NMR and MS spectra of 1-8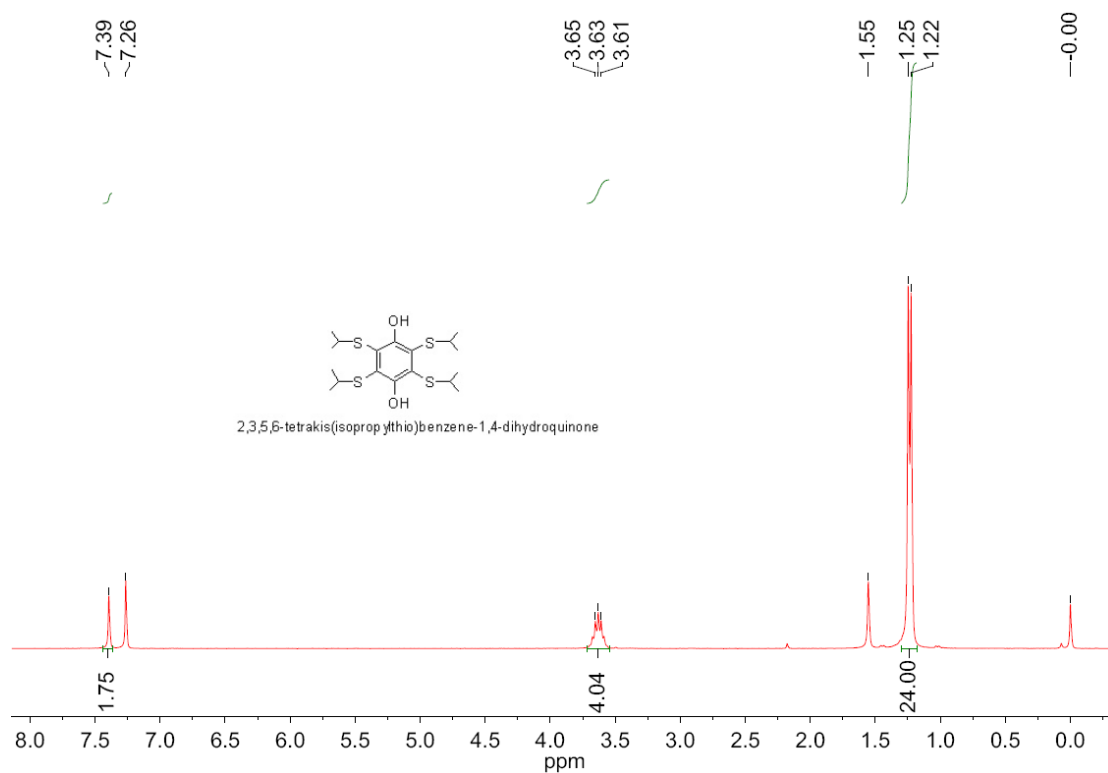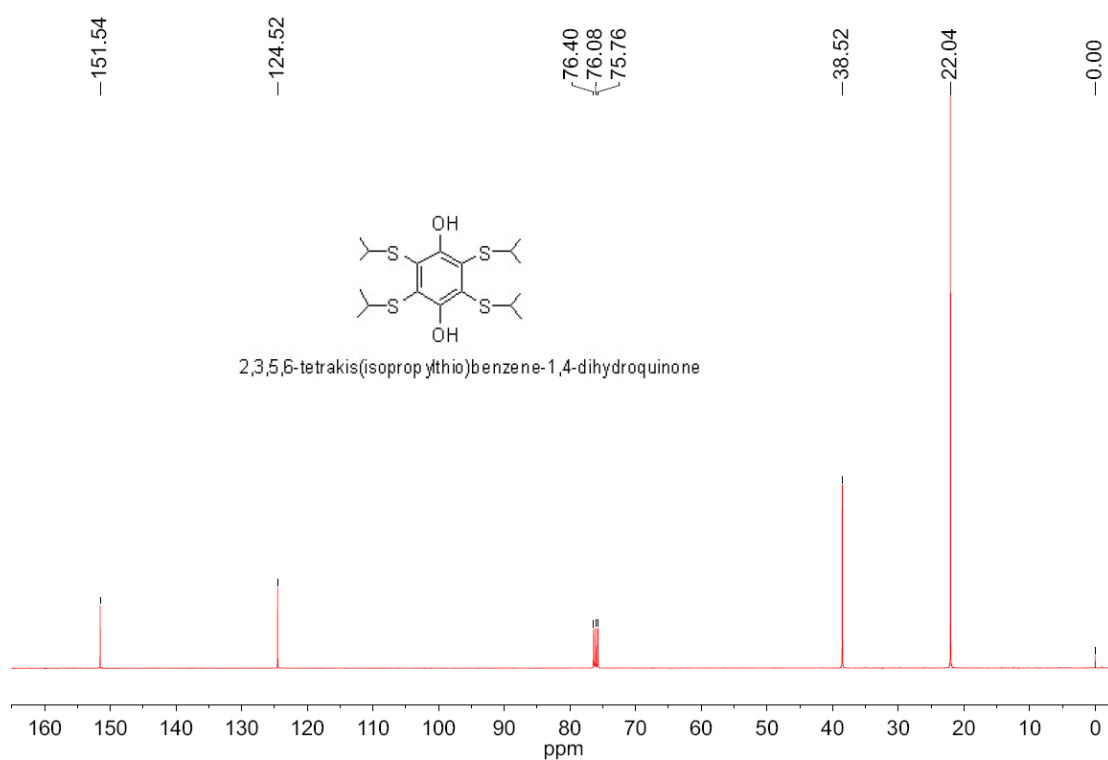

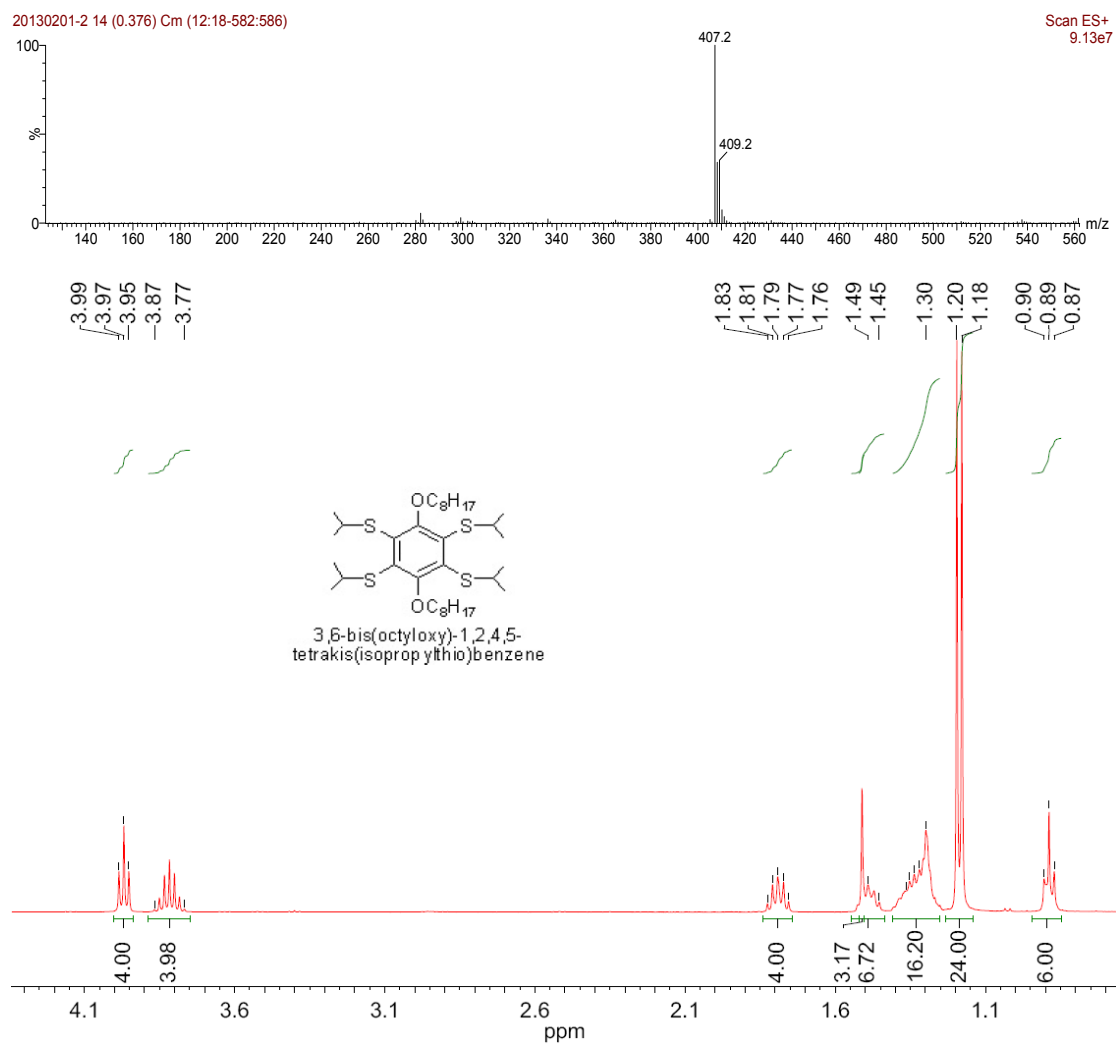

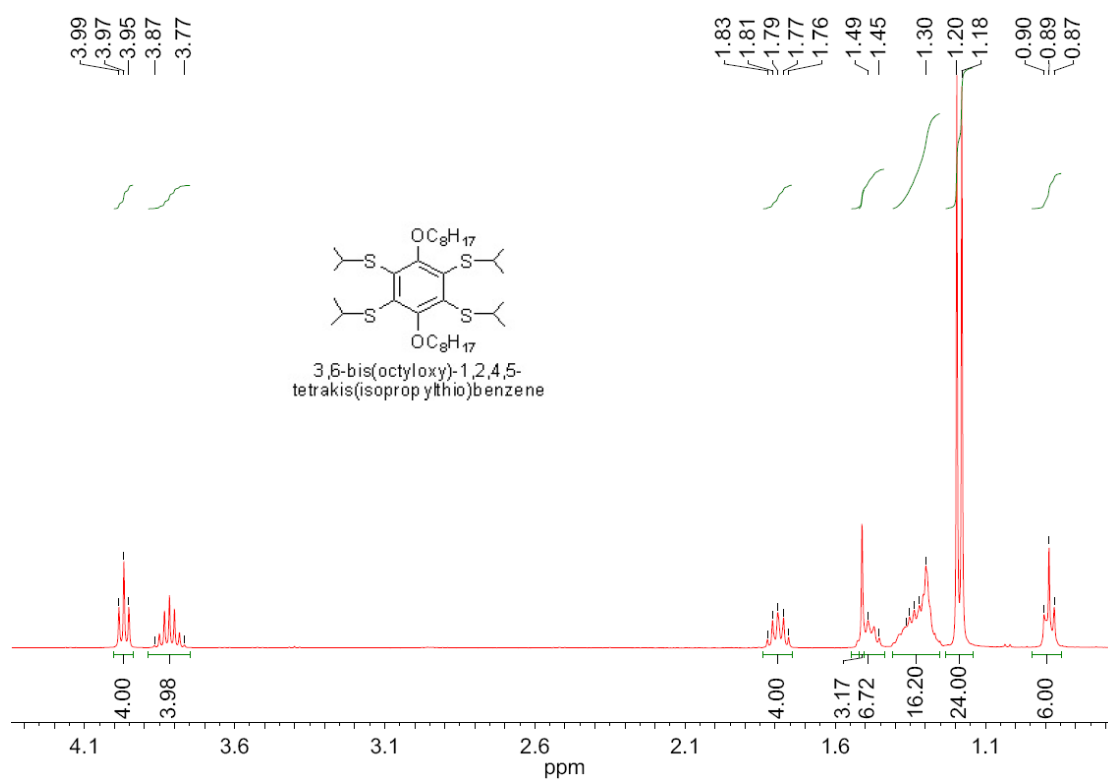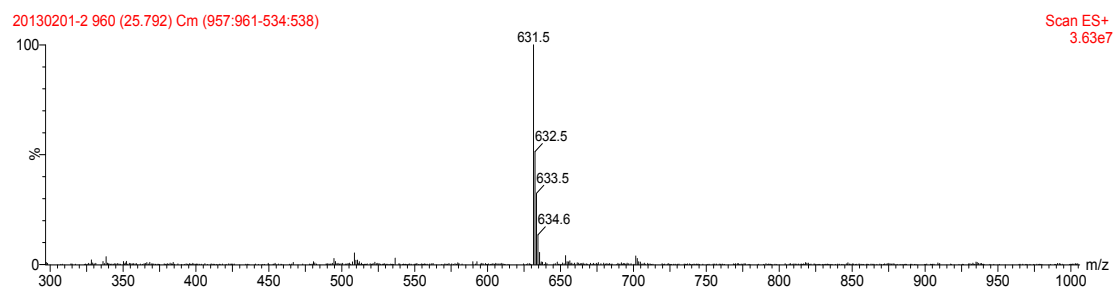

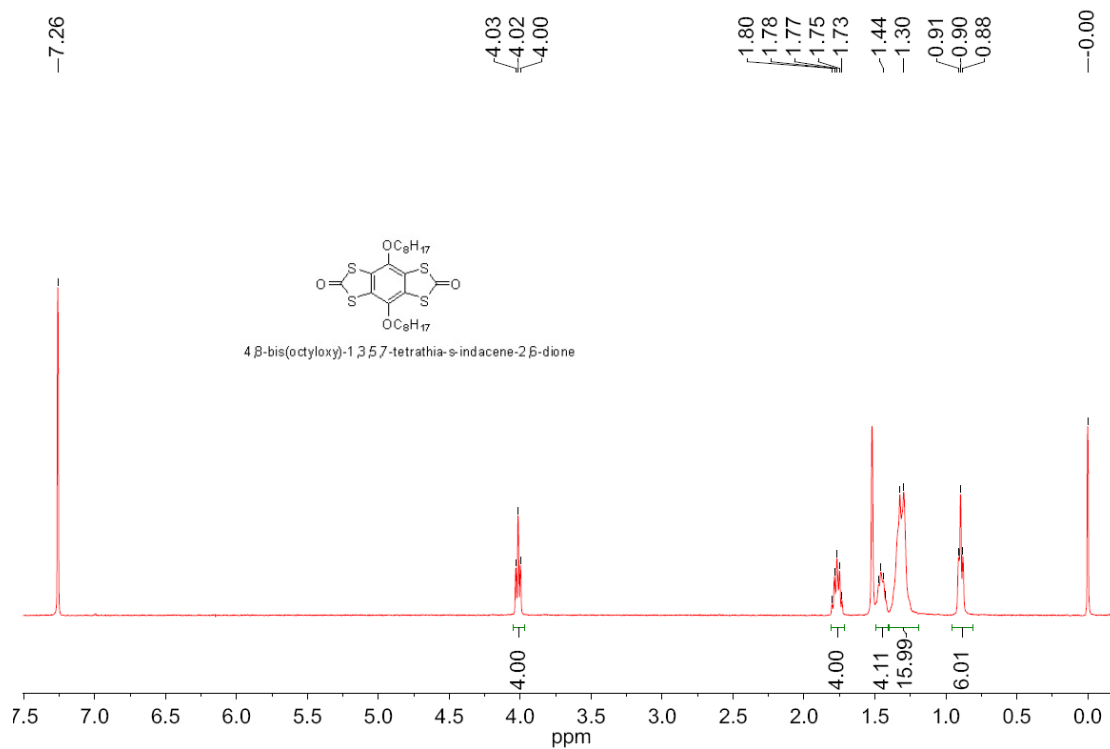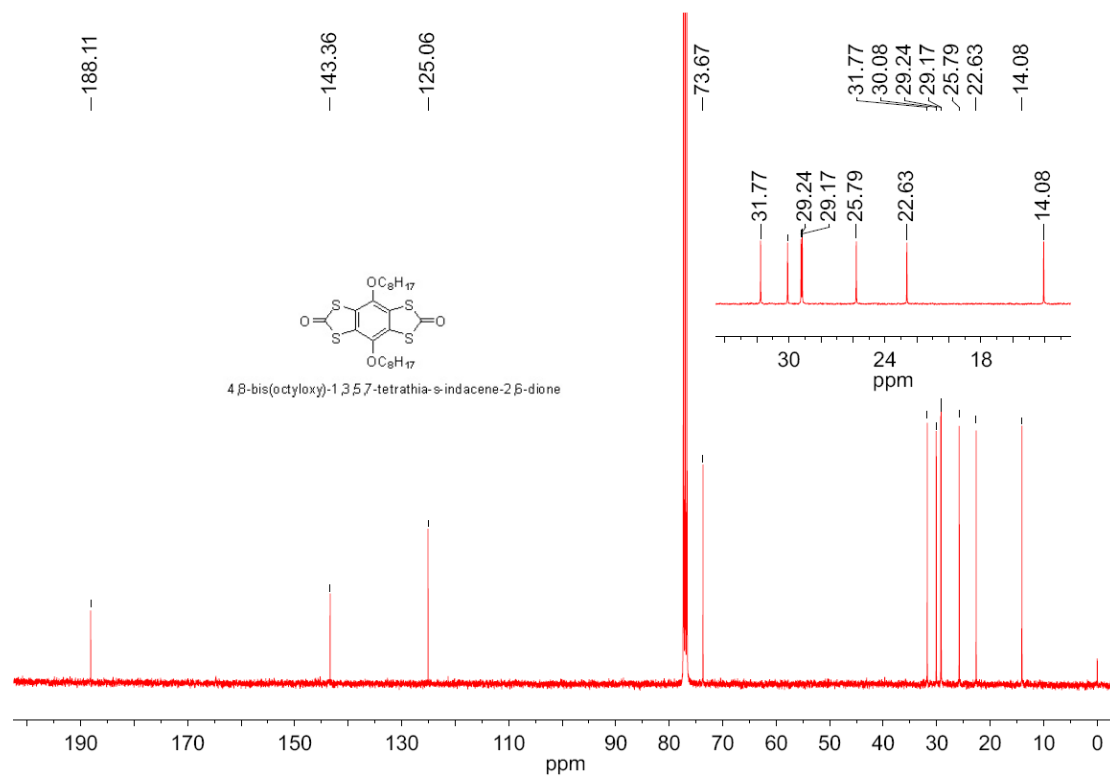



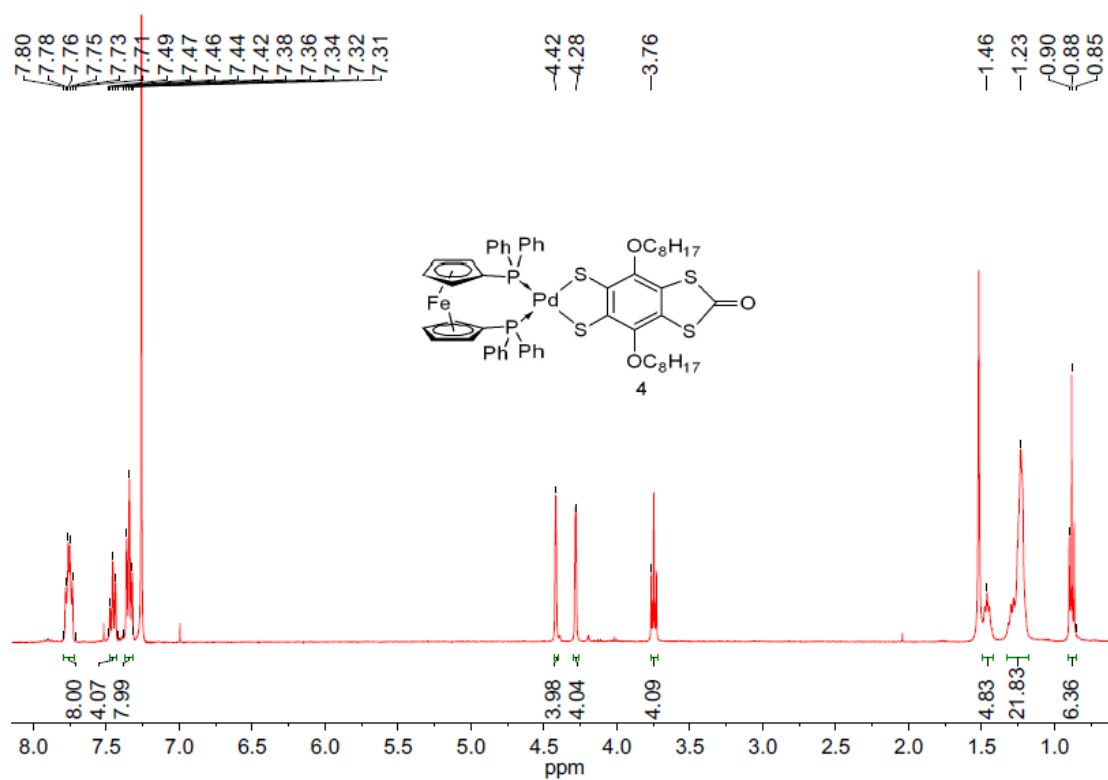

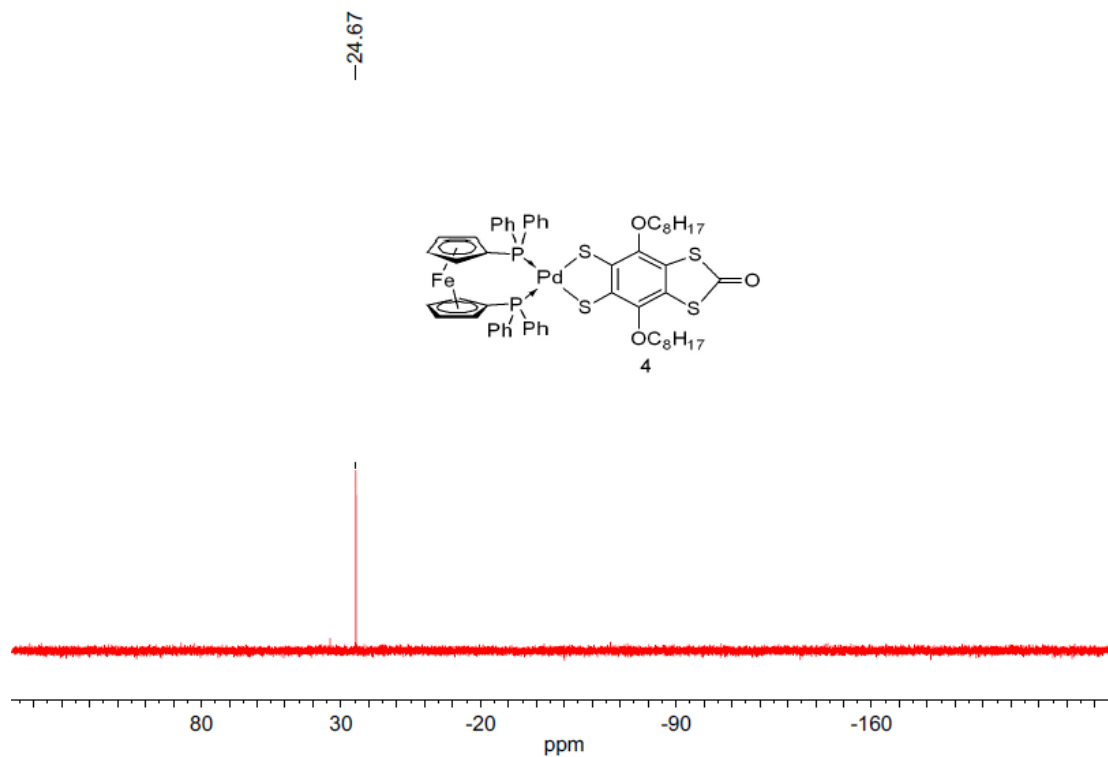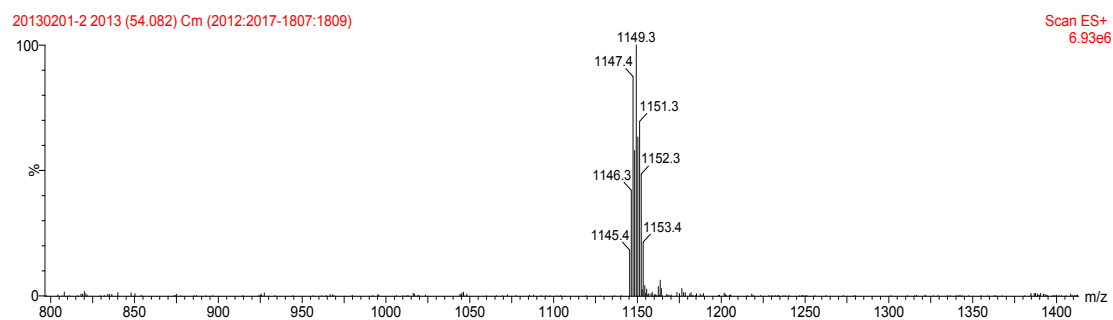

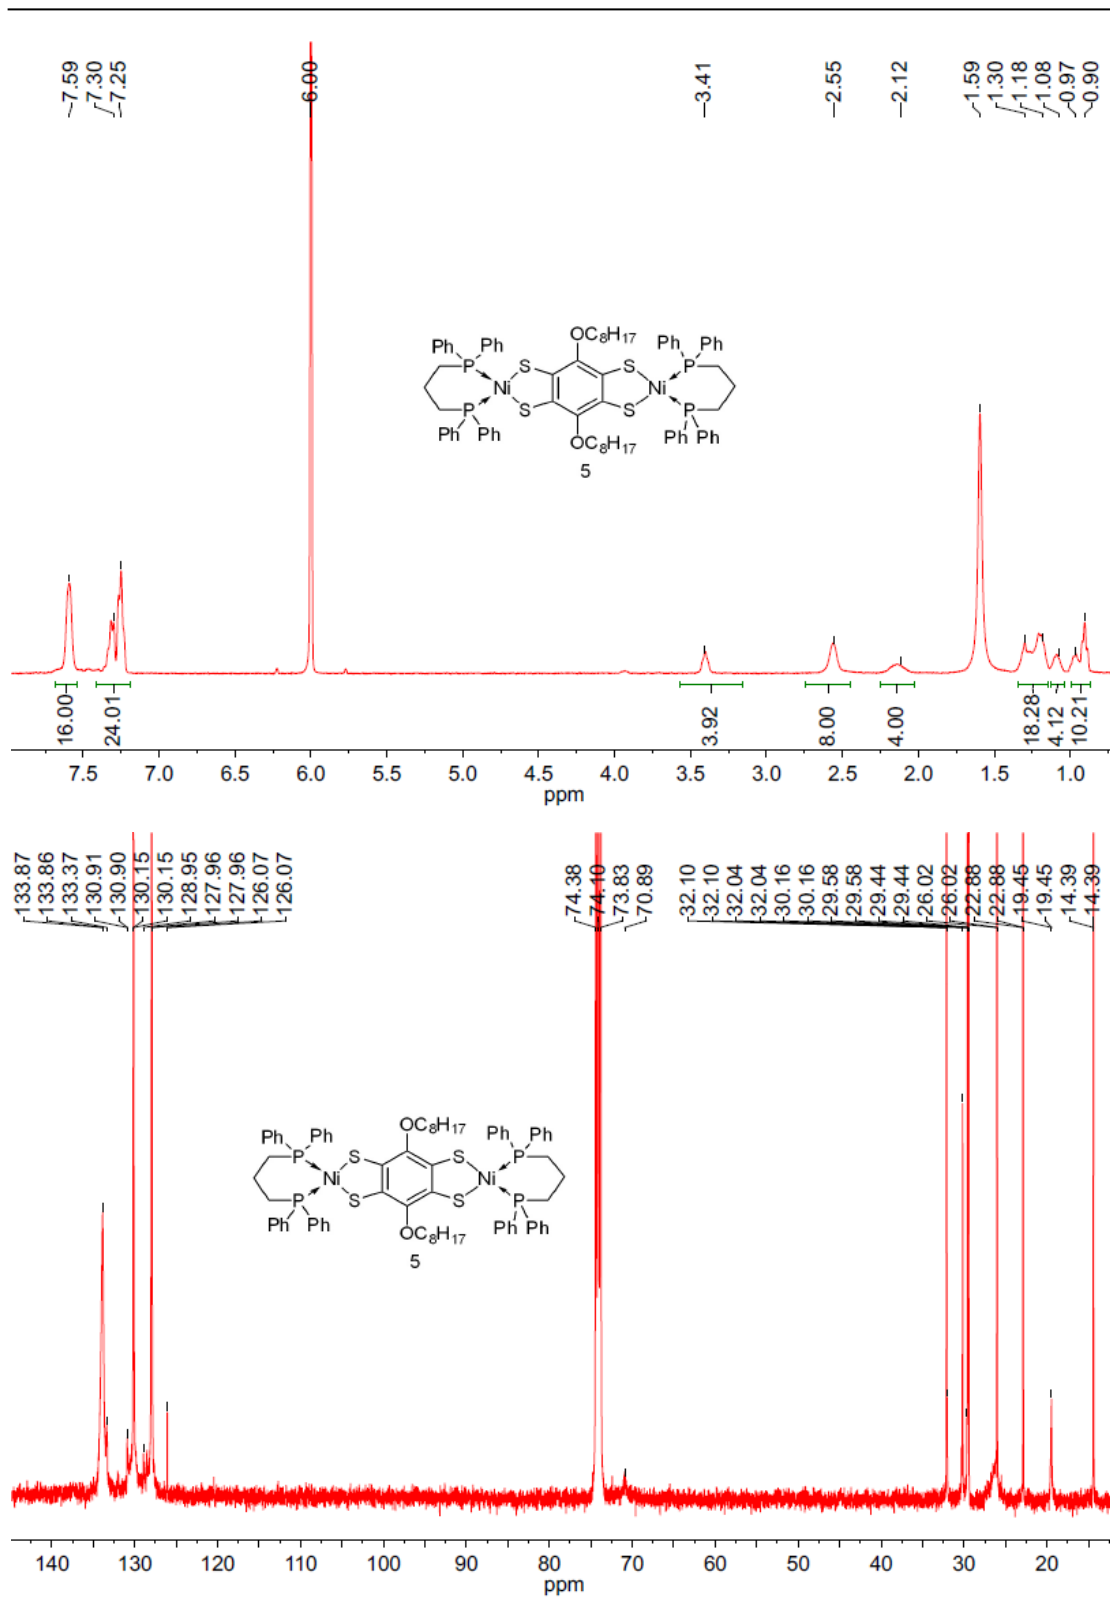

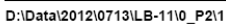

Comment 1 DCTB

Comment 2

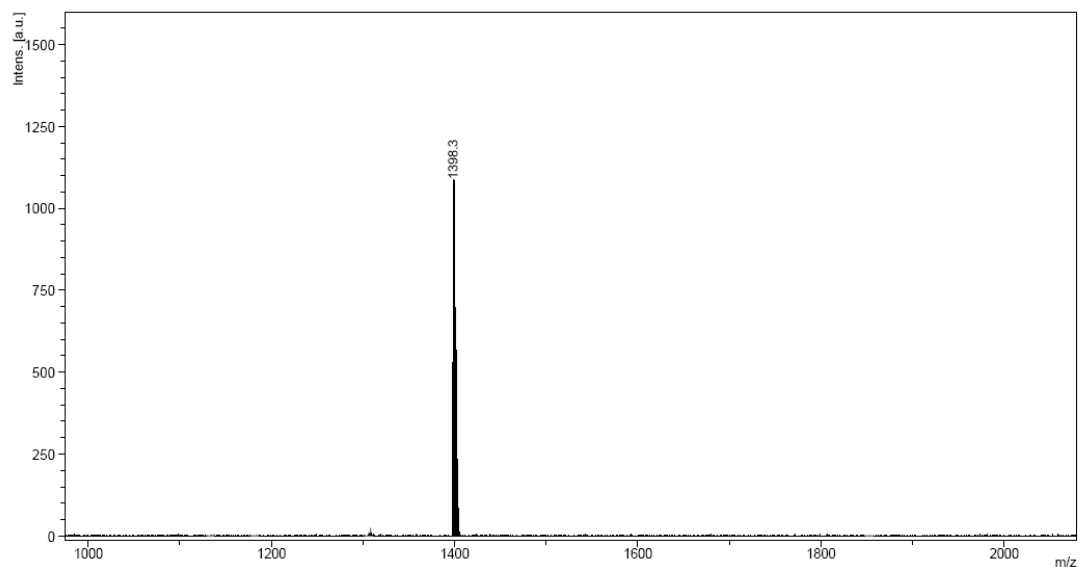

Bruker Daltonics flexAnalysis

printed: 7/16/2012 9:12:41 AM

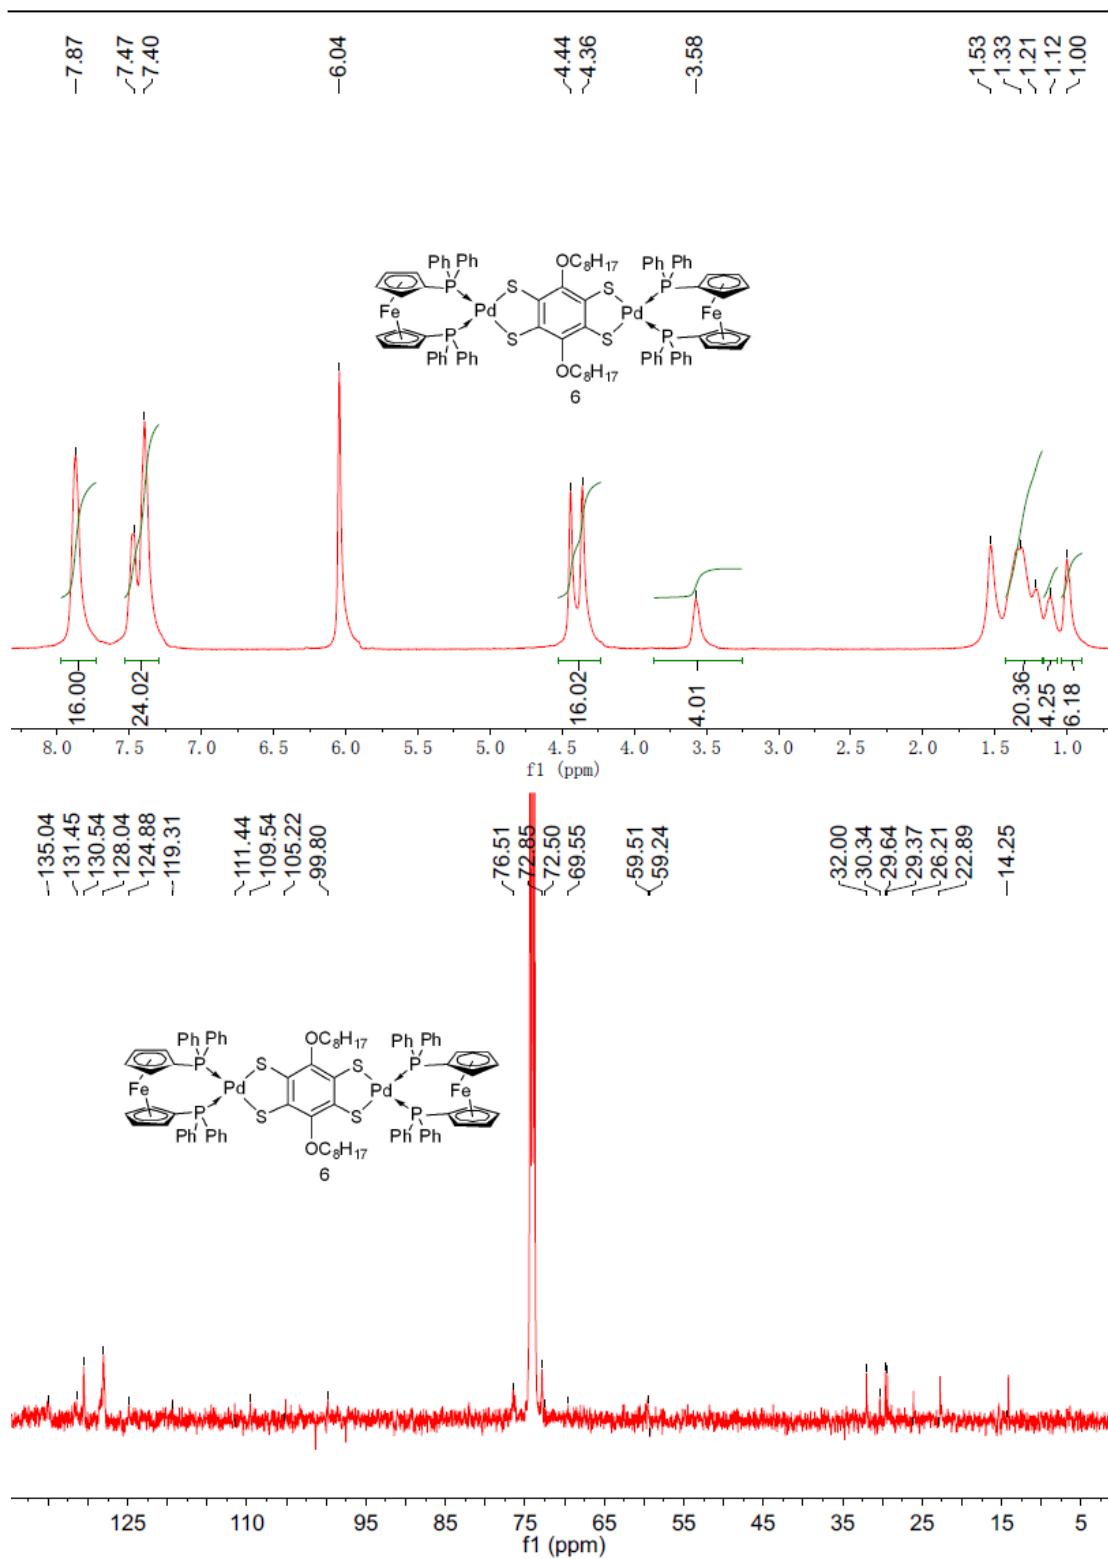

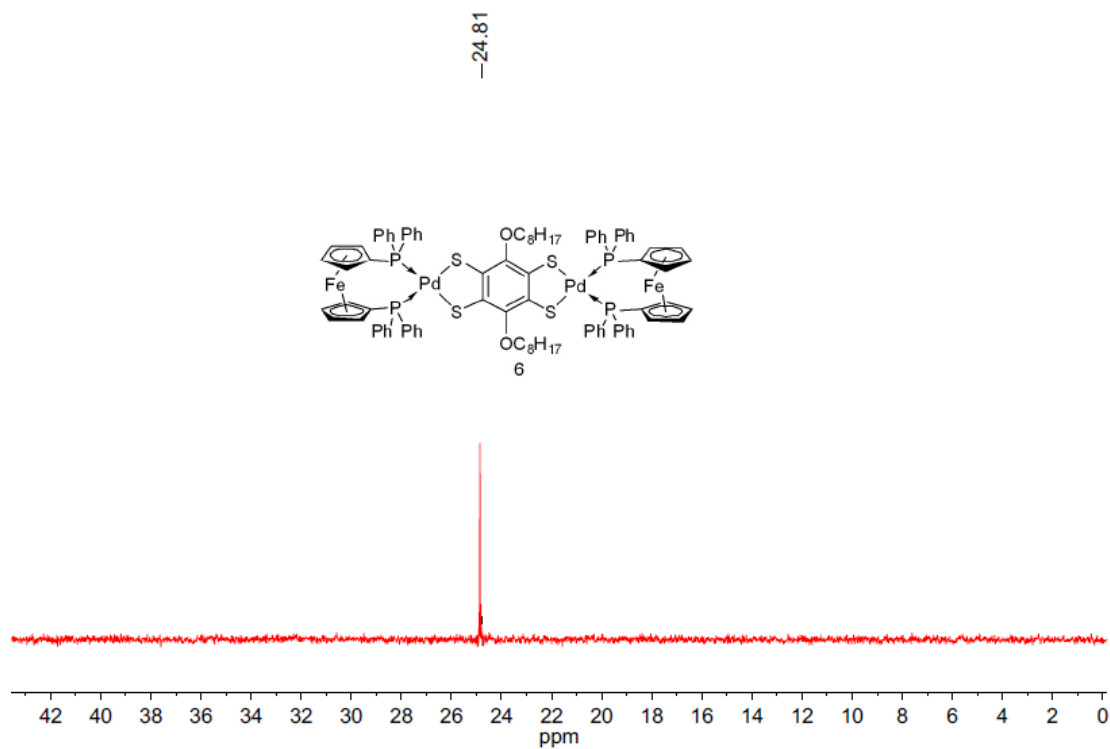

D:\Data\2012\0926\LB-19\0\_E6\1

Comment 1 DCTB

Comment 2

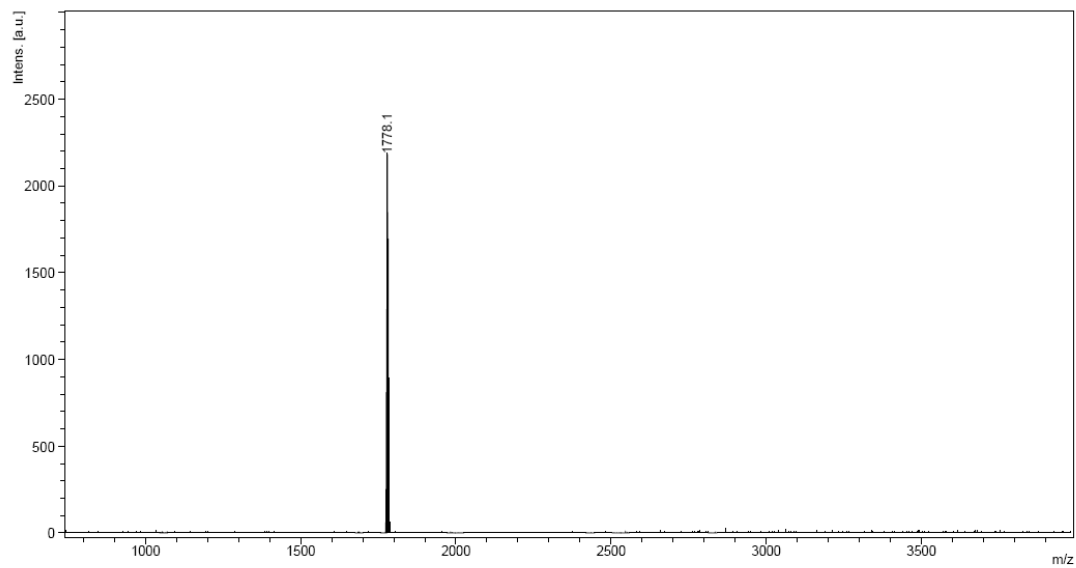

Bruker Daltonics flexAnalysis

printed: 9/26/2012 5:11:16 PM

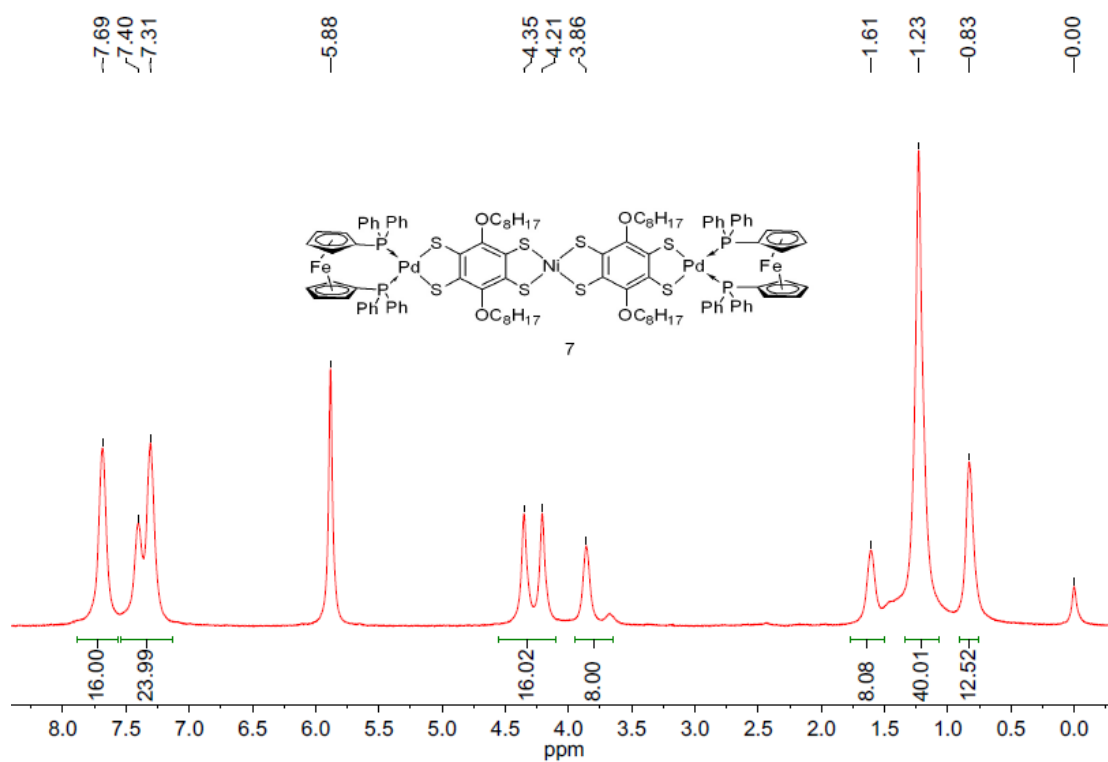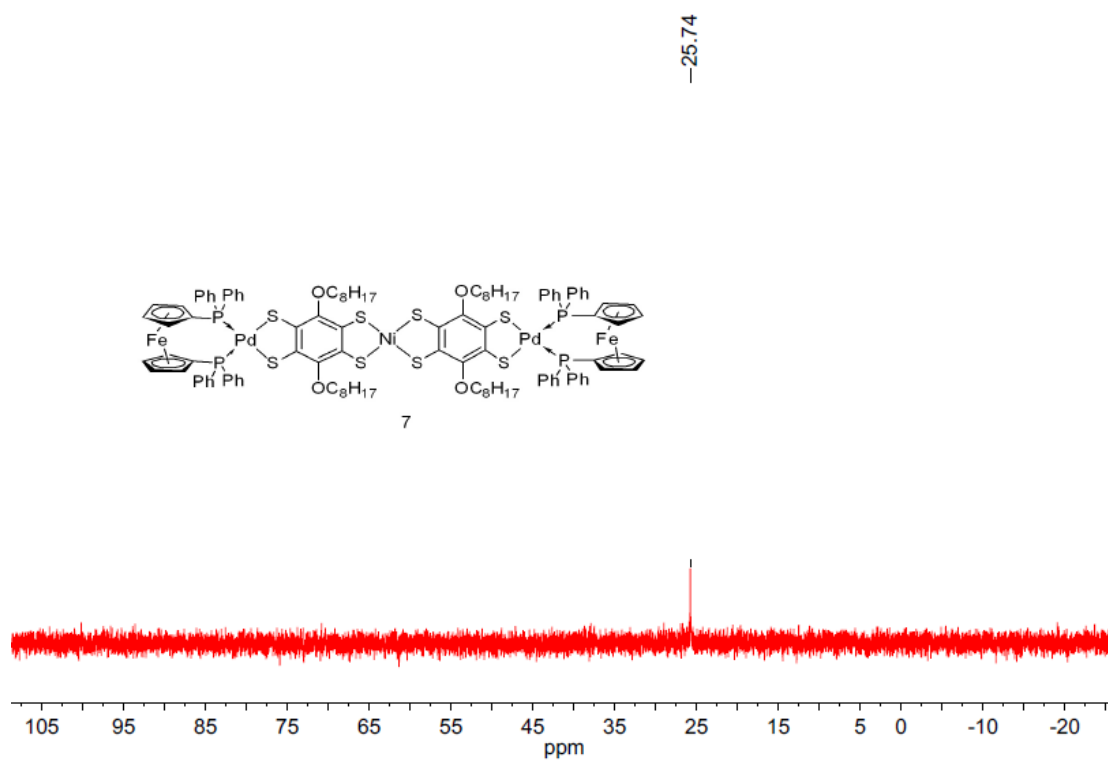

Comment 1 DCTB  
Comment 2

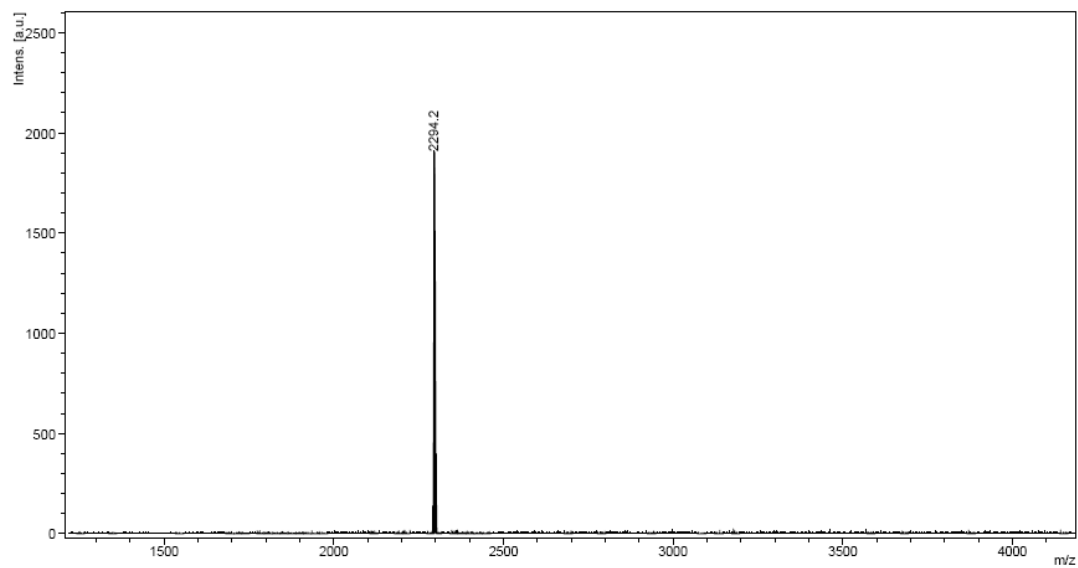

Bruker Daltonics flexAnalysis

printed: 11/8/2012 6:11:23 PM

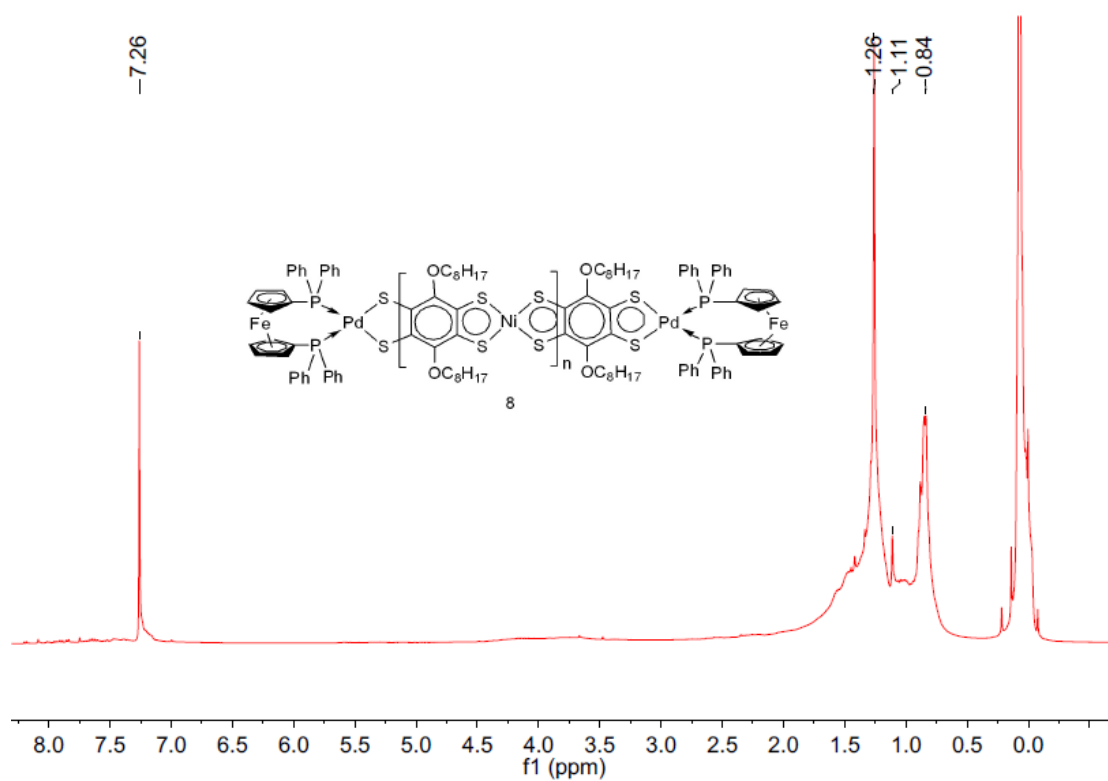



—25.79

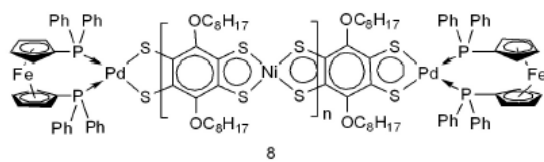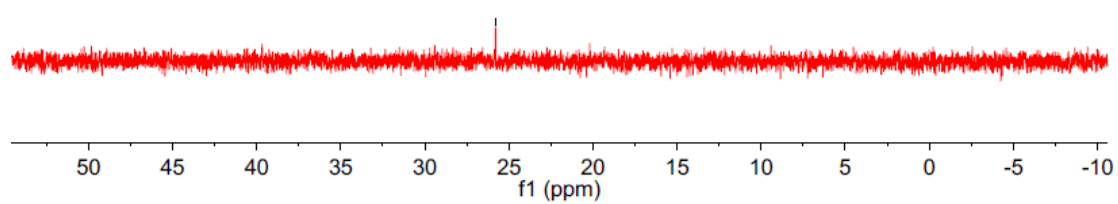

**SI-5. Cyclic voltammograms of complexes 4-7**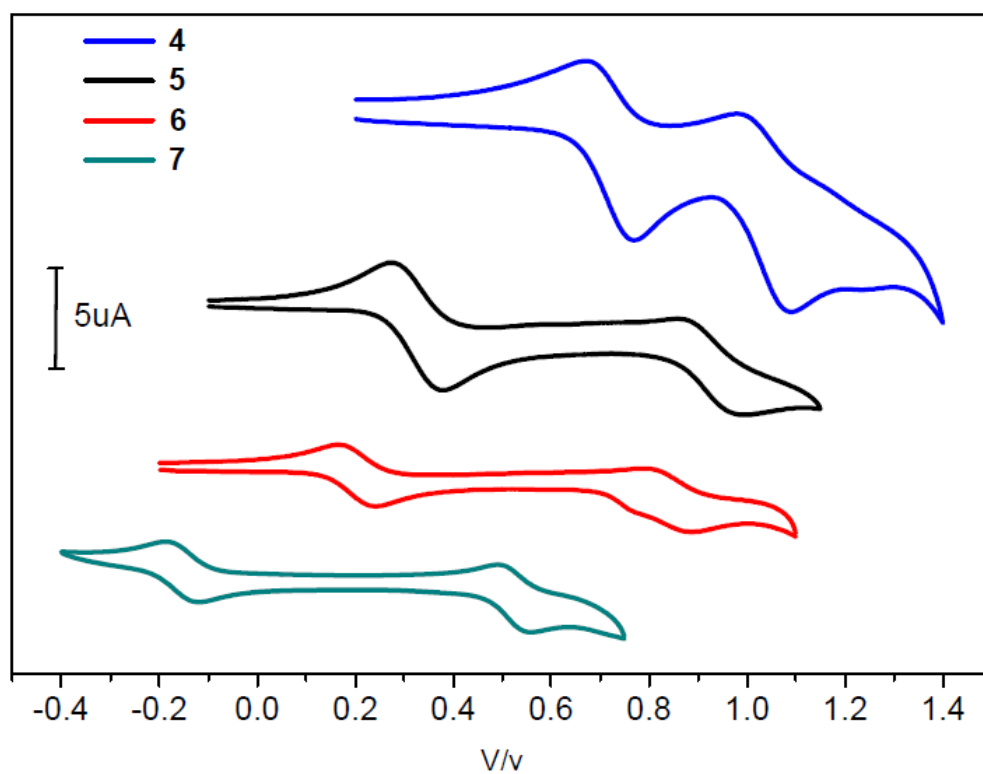

**Figure S5.** Cyclic voltammograms of complexes 4-7 in DCM.

---

**SI-6. TGA of Polymer 8**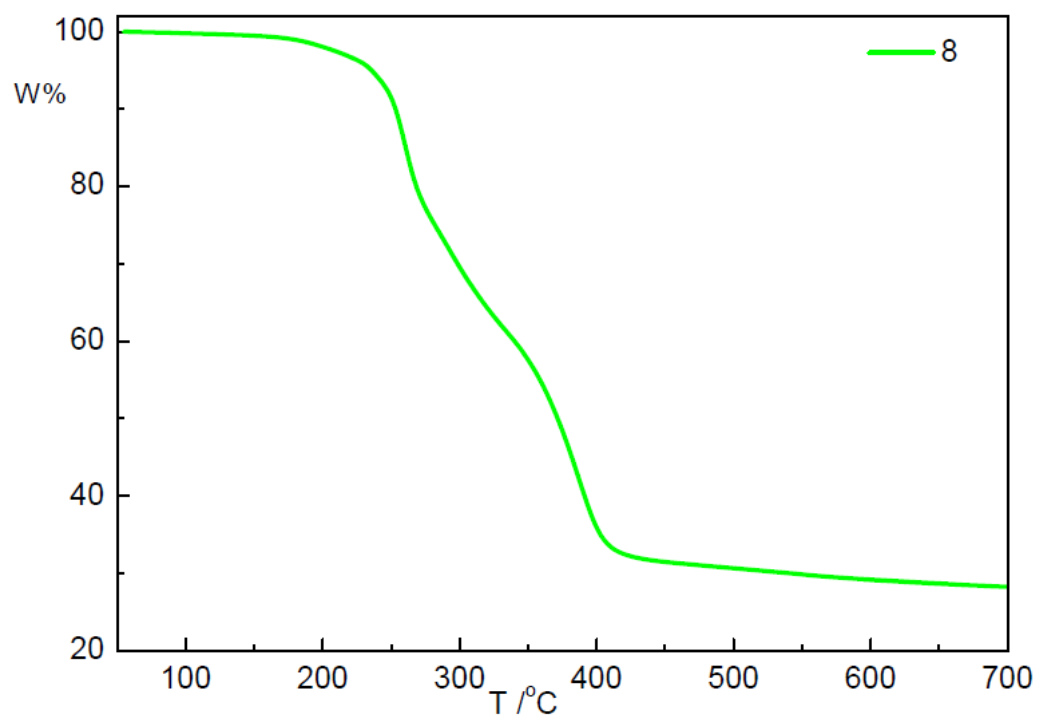

**Figure S6.** Thermogravimetry of polymer **8** under N<sub>2</sub> with a heating rate of 1 °C/min from 50 to 800 °C.

**SI-7. CV for polymer 8**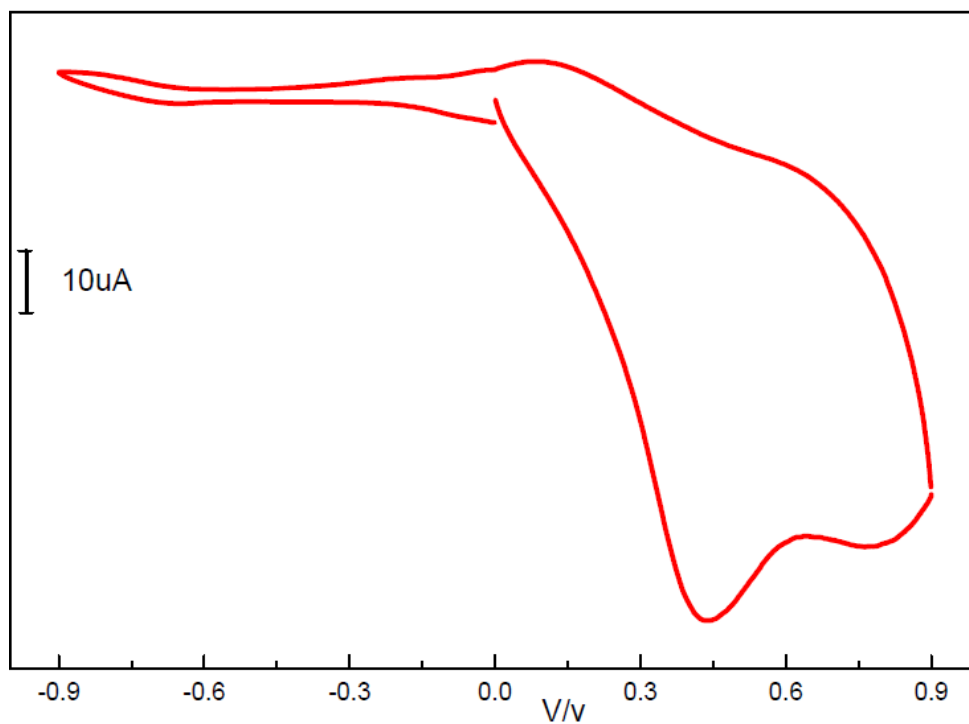

**Figure S7.** CV of a thin film of polymer **8** coated on the Glass-Carbon electrode in  $\text{CH}_3\text{CN}$  with a scan rate of  $100 \text{ mV} \cdot \text{S}^{-1}$

**SI-8. GPC analysis of polymer 8**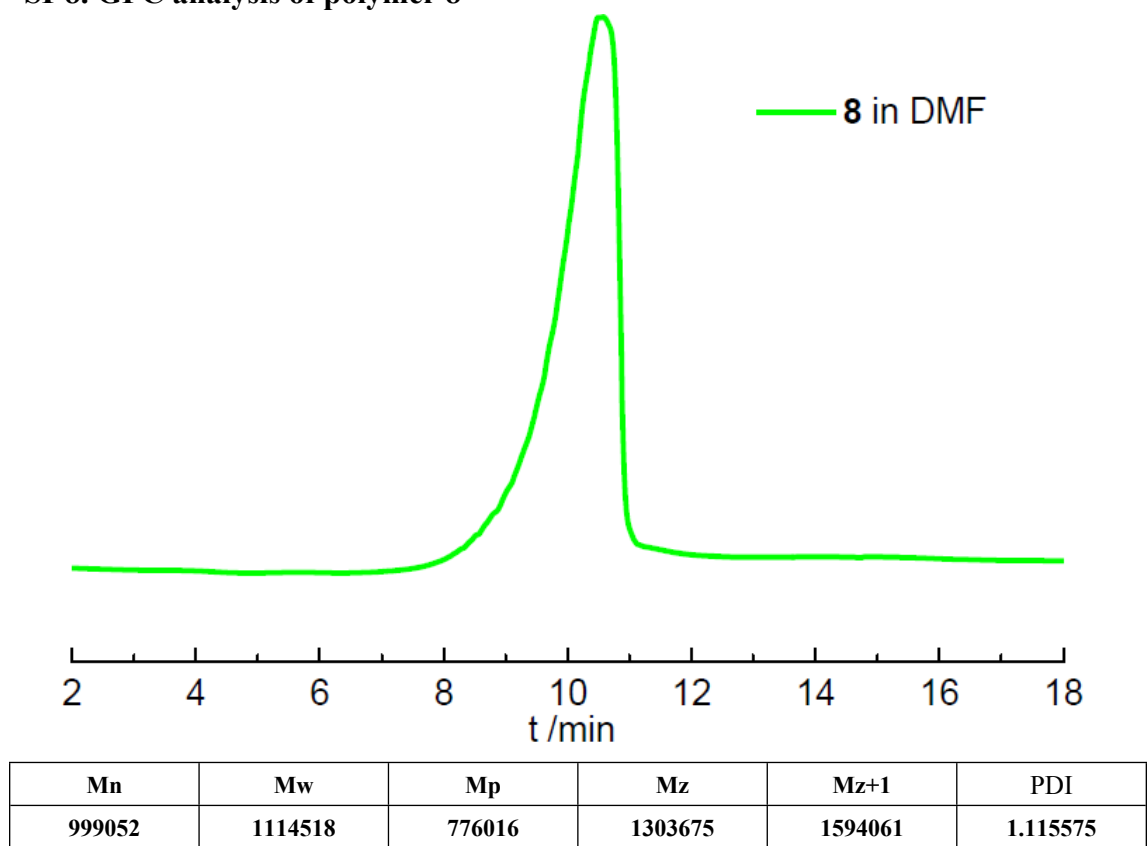

**Figure S8.** GPC trace and data of polymer 8, using DMF as eluting solvent and relative to polystyrene standard.

## SI-9. Preparation and characterizations of colorless films from blends of 7 and PSMMA

Complex 7 was blended into poly[styrene-co-(methyl methacrylate)] (PSMMA) with different mass ratio (7/PSMMA) in chloroform, and the mixture was drop cast on a quartz plate. After evaporation of chloroform, the transparent films were obtained and almost colorless visually. The spectroscopic characterizations and photos of the films placed on color substrate to show visual transparency are shown below.

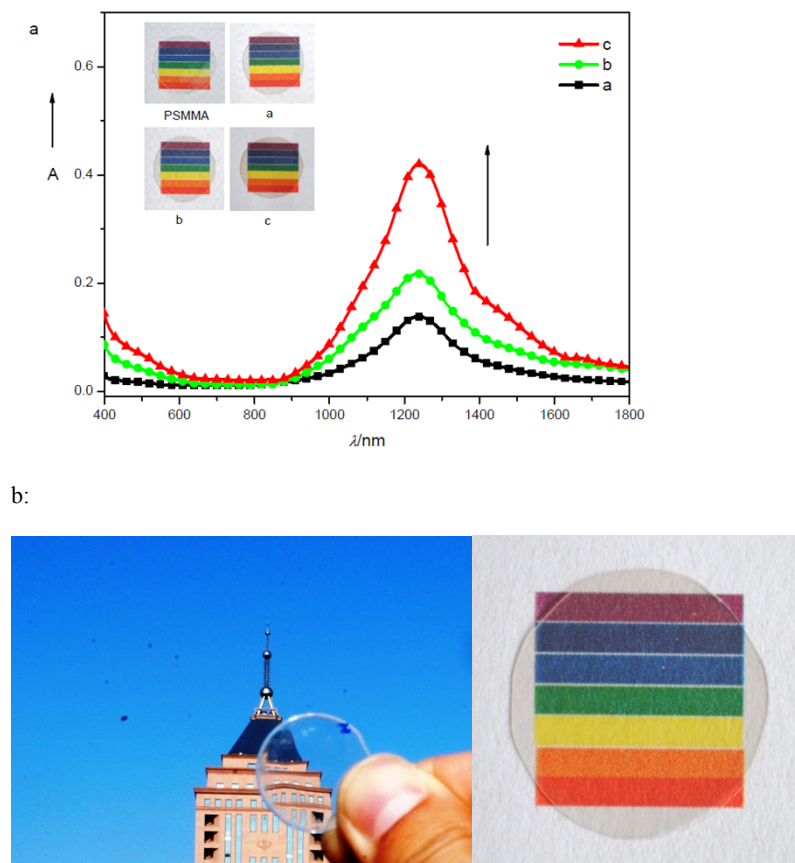

**Figure S9.** a) Photos of the films of 7 in PSMMA polymer and the absorption of the films with different mass ratios of 7/PSMMA: a (0.3 wt%), b (0.4 wt%), c (0.8 wt%), b) photos of the transparent film b (0.4 wt%) of 7 in PSMMA.

### SI-10. Preparation and characterizations of colorless films of **8**/PVDF blends

Polymer **8** was dissolved in a different weight together with 75 mg of PVDF in DMF and the polymer solution was then drop cast on a quartz plate. After evaporation of DMF at room temperature in two weeks, the films were obtained in about 0.202~0.204 mm thickness and appear to be light yellow-greenish and transparent visually. The spectroscopic characterizations and photos of the films placed on top of color strips are shown below.

a

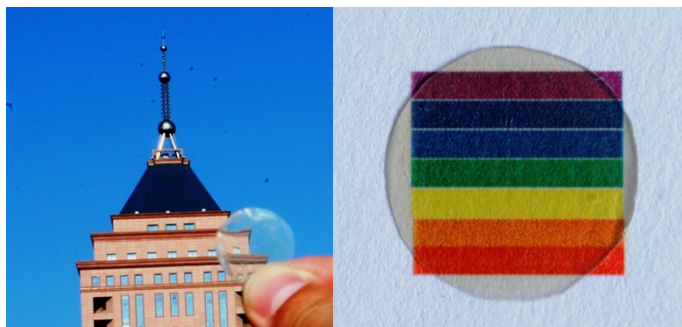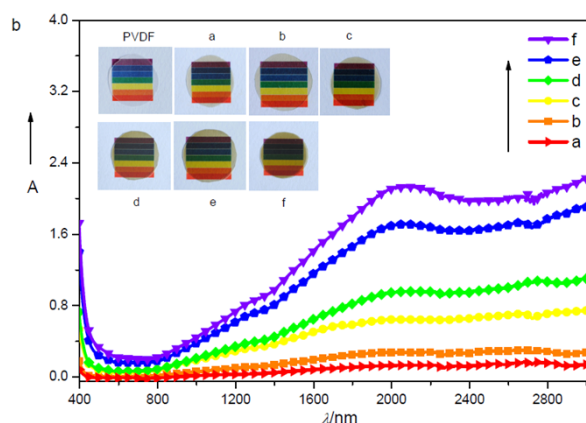

**Figure S10.** a) Photos of the film d of **8**/PVDF blend. b) Photos and absorption spectra of the films of **8** with a different weight blended in PVDF (75 mg): a (50  $\mu\text{g}$ ), b (75  $\mu\text{g}$ ), c (125  $\mu\text{g}$ ), d (225  $\mu\text{g}$ ), e (375  $\mu\text{g}$ ), f (475  $\mu\text{g}$ ). c) Transmittance (400 – 6400 nm) of polymer **8** blended in PVDF films with different weights of **8** in PVDF (75 mg): a (0.07 wt%), b (0.1 wt%), c (0.17 wt%), d (0.3 wt%), e (0.5 wt%), f (0.63 wt%). Inset: Transparency comparison of PVDF films and **8** blended in PVDF films a-f.

### References

- [1] M. Kulka, Can. J. Chem. 1962, 40, 1235-1241.
- [2] J. Larsen, K. Bechgaard, J. Org. Chem. 1987, 52, 3285-3288.
- [3] F. E. Hahn, T. Eiting, W. W. Seidel, T. Pape, Eur. J. Inorg. Chem. 2010, 16, 2393-2399.
- [4] K. Arumugam, R. Yu, D. Villagrán, T. G. Gray, J. T. Mague, J. P. Donahue, Inorg. Chem. 2008, 47, 5570-5572.
